# Supplementary material
Source: MDPI journal article supplement (https://www.mdpi.com/2076-3417/13/12/6930)
Supplement: s1 [file s1]

# Supplementary

The supplementary is divided into three chapters.

## Accuracy and standard deviation

In this chapter we report about the mean and standard deviation of the different experiments.

The standard derivation is reported in the brackets.

This experiment is the classification over the full range of LOS.

| Method | Accuracy         | F1                | balanced Accuracy | MCC               | AUC               |
|--------|------------------|-------------------|-------------------|-------------------|-------------------|
| LR     | 0.784<br>(0.003) | 0.435<br>(0.0010) | 0.608<br>(0.0033) | 0.303<br>(0.010)  | 0.735<br>(0.0069) |
| SVM    | 0.792<br>(0.003) | 0.438<br>(0.0010) | 0.610<br>(0.0033) | 0.326<br>(0.0076) | 0.800<br>(0.0045) |
| RF     | 0.810<br>(0.003) | 0.442<br>(0.0009) | 0.653<br>(0.0024) | 0.406<br>(0.0050) | 0.740<br>(0.0041) |
| XG     | 0.802<br>(0.004) | 0.438<br>(0.0015) | 0.669<br>(0.0025) | 0.398<br>(0.0072) | 0.777<br>(0.0035) |

This experiment is the regression over the full LOS from 1 to 21.

| Method | RMSD           | MAE            | MAPE            | R <sup>2</sup> |
|--------|----------------|----------------|-----------------|----------------|
| LR     | 2.893 (0.0454) | 1.916 (0.0181) | 70.655 (0.5755) | 0.439 (0.0097) |
| SVM    | 2.908 (0.0437) | 1.684 (0.0178) | 48.369 (0.3020) | 0.483 (0.0100) |
| RF     | 2.807 (0.0347) | 1.868 (0.0136) | 69.561 (0.5615) | 0.493 (0.0078) |
| XG     | 3.001 (0.0301) | 1.990 (0.0042) | 72.075 (0.8323) | 0.434 (0.0062) |

This table is the experiment where we only predict the exact LOS but only in the range from 1-4 days

| Method | RMSD           | MAE            | MAPE            | R <sup>2</sup> |
|--------|----------------|----------------|-----------------|----------------|
| LR     | 0.772 (0.0059) | 0.636 (0.0053) | 35.169 (0.3375) | 0.283 (0.0102) |
| SVM    | 0.781 (0.0080) | 0.612 (0.0064) | 31.269 (0.3290) | 0.326 (0.0100) |
| RF     | 0.755 (0.0062) | 0.621 (0.0056) | 34.542 (0.3456) | 0.350 (0.0094) |
| XG     | 0.825 (0.0050) | 0.664 (0.0042) | 36.352 (0.2385) | 0.252 (0.0075) |

This is the results of the experiment where we first classify the stays into short and long and use the predicted short stay for a regression task. The used model is the random forest.

| Method | RMSD           | MAE            | MAPE            | R <sup>2</sup> |
|--------|----------------|----------------|-----------------|----------------|
| LR     | 1.073 (0.0368) | 0.743 (0.0077) | 38.869 (0.2340) | 0.199 (0.0135) |
| SVM    | 1.096 (0.0374) | 0.711 (0.0084) | 33.107 (0.2407) | 0.228 (0.0121) |
| RF     | 1.068 (0.0381) | 0.741 (0.0081) | 39.294 (0.2409) | 0.230 (0.0171) |
| XG     | 1.166 (0.0348) | 0.805 (0.0052) | 41.682 (0.4674) | 0.160 (0.0114) |

This is the results of the experiment where we first classify the stays into short and long and use the predicted short stay for a regression task. The used model is the XGBoost.

| Method | RMSD           | MAE            | MAPE            | R <sup>2</sup> |
|--------|----------------|----------------|-----------------|----------------|
| LR     | 1.138 (0.0351) | 0.763 (0.0063) | 39.529 (0.4295) | 0.217 (0.0114) |
| SVM    | 1.156 (0.0362) | 0.726 (0.0077) | 33.491 (0.2444) | 0.244 (0.0116) |
| RF     | 1.131 (0.0364) | 0.761 (0.0067) | 39.938 (0.4579) | 0.251 (0.0130) |
| XG     | 1.227 (0.0288) | 0.828 (0.0063) | 42.317 (0.5475) | 0.176 (0.0083) |

## Distribution train and test data

| Run | % Train data short stays | % Test data short stays |
|-----|--------------------------|-------------------------|
| 1   | 75.70                    | 76.13                   |
| 2   | 75.60                    | 76.54                   |
| 3   | 75.64                    | 76.36                   |
| 4   | 75.89                    | 75.40                   |
| 5   | 75.70                    | 76.11                   |
| 6   | 75.80                    | 75.75                   |
| 7   | 77.05                    | 75.71                   |
| 8   | 76.12                    | 75.79                   |
| 9   | 75.77                    | 75.82                   |

|    |       |       |
|----|-------|-------|
| 10 | 75.79 | 75.79 |
|----|-------|-------|

## Gmean and confusion matrix

For the selection of the threshold in the classification task experiment with the stepwise regression where there is a classification and then a regression. For the selection of the short stays we used two models: random forest and XGBoost. For the calculation of the best threshold we use the Gmean (geometric mean) and therefore present the results of the calculation.

### Random forest

Here is the random forest gmean results which is shown in the graph below. The graph has a optimum at 0.23 with a gmean of 0.693. The thresholds ranges from 0.01 to 0.99.

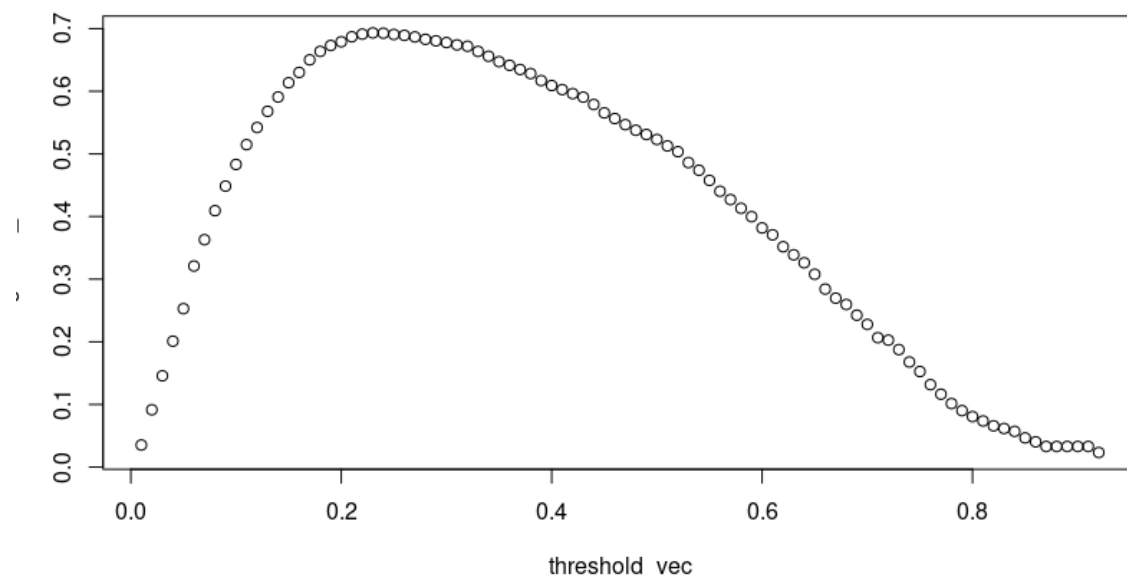

For the highest gmean we also show the confusion matrix. Note that the metrics of this matrix is much better than the reported because the gmean was optimised which is not the case for the calculation in the paper.

|                   | prediction long stay | prediction short stay |
|-------------------|----------------------|-----------------------|
| actual long stay  | 9108                 | 516                   |
| actual short stay | 2469                 | 29380                 |

### XGBoost

For the XGBoost we show the same results. The XGBoost has a different shape of the “curve” as the random forest with its optimum at 0.02 with and gmean of 0.687. We explain

this behavior from the extreme gradient boosting inside of the XGBoost algorithm which pushes the probabilities through the limit and therefore the threshold we will be heavily on one side.

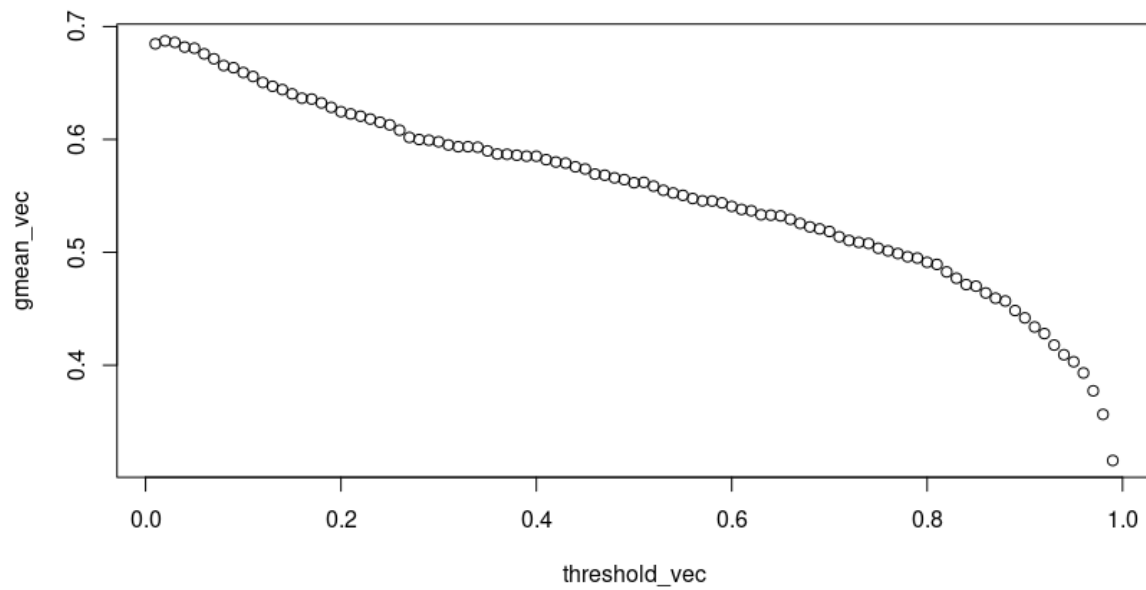

For the highest gmean we also show the confusion matrix. Note that the metrics of this matrix is much better than the reported because the gmean was optimised which is not the case for the calculation in the paper.

|                   | prediction long stay | prediction short stay |
|-------------------|----------------------|-----------------------|
| actual long stay  | 9007                 | 617                   |
| actual short stay | 1873                 | 29976                 |

# Diagnosis MIMIC IV and ICD transformation

The ICD transformation is briefly described in the manuscript but here we would like to make a practical example of how it works.

Diagnoses in ICD 9 and 10 available;  
total diagnoses ICD 9 : ~55%  
total diagnoses ICD 10: ~45%

Converting 9 to 10 with the [Touch](#) package -> 4 cases

- 1 case: icd 9 = 5723 to icd 10=K766 ( 73.89%)
- 2 case: icd 9 = 5715 to icd 10= K740,K7460, K7469 (23.26 %)
- 3 case: icd 9 = 8603 to icd 10 = S271XXA+S21309A (0.65 %)
- 4 case: icd 9 = E9331 to icd 10 = (2.00%)

example:

For the example we choose two ICD 9 codes from the MIMIC IV database. This represent a usecase is an example.

This comes out of the conversion from ICD version 9 to 10.

| icd_code | icd_version | icd_code_10      |
|----------|-------------|------------------|
| 5715     | 9           | K740,K7460,K7469 |
| 30981    | 9           | F4310,F4312      |

Now our goal was to have a single ICD code for the 'icd\_code\_10' column. This allows us the proceed further like all ICD Codes would be in ICD 10.

First we shorten the 'icd\_code\_10 shorten' to the smallest number of digits from the ICD codes available (in this case 4) -> K740, K746, K746

Then we start a loop where we reduce the number of symbols in each string by 1 till the a ICD 10 code is found or there is no solution.

find overlapping between icd\_cod\_10

# K746 = 2

# K740 = 1

reducing length string by 1 : K74, K74, K74

# K74 = 3 -> only one ICD 10 code present in the data

If there is no ICD 10 code found then we declare the conversion as failed (NA).

The result:

| icd_code | icd_version | icd_code_10 |
|----------|-------------|-------------|
| 5715     | 9           | K74         |
| 30981    | 9           | F431        |
